# Supplementary material for: Arylic C–X Bond Activation by Palladium Catalysts: Activation Strain Analyses of Reactivity Trends
Source: PubMed Central journal article supplement (PMC6048108; doi:10.1038/s41598-018-28998-3), 2018-07-16
Supplement: 41598_2018_28998_MOESM1_ESM.pdf [file 41598_2018_28998_MOESM1_ESM.pdf]

Supplementary Information for

**Arylic C–X Bond Activation by Palladium Catalysts:  
Activation Strain Analyses of Reactivity Trends**

Pascal Vermeeren<sup>1</sup>, Xiaobo Sun<sup>1</sup>, and F. Matthias Bickelhaupt<sup>\*1,2</sup>

- 1 Department of Theoretical Chemistry and Amsterdam Center for Multiscale Modeling, Vrije Universiteit Amsterdam, De Boelelaan 1083, 1081 HV Amsterdam, The Netherlands.
- 2 Radboud University Nijmegen, Institute for Molecules and Materials, Heyendaalseweg 135, 6525 AJ Nijmegen, The Netherlands.

E-mail: F.M.Bickelhaupt@vu.nl

**Supplementary Table 1.** Relative enthalpies (in kcal mol<sup>-1</sup>) of stationary points along the oxidative addition of the benzene C–H, chlorobenzene C–Cl, and toluene C–C bond to the palladium–phosphine catalysts. <sup>[a]</sup>

|      |                                                                    | RC    | TS   | PC    |
|------|--------------------------------------------------------------------|-------|------|-------|
| C–H  | Pd                                                                 | -20.6 | -3.8 | -7.2  |
|      | Pd(PH <sub>3</sub> )                                               | -14.1 | 14.3 | 14.9  |
|      | Pd(PH <sub>3</sub> ) <sub>2</sub>                                  | -0.4  | 24.6 | 22.6  |
|      | Pd(PH <sub>2</sub> C <sub>2</sub> H <sub>4</sub> PH <sub>2</sub> ) | -7.0  | 11.3 | 8.7   |
| C–Cl | Pd                                                                 | -10.6 | -7.2 | -33.1 |
|      | Pd(PH <sub>3</sub> )                                               | -10.8 | -4.5 | -22.8 |
|      | Pd(PH <sub>3</sub> ) <sub>2</sub>                                  | -0.5  | 18.5 | -8.4  |
|      | Pd(PH <sub>2</sub> C <sub>2</sub> H <sub>4</sub> PH <sub>2</sub> ) | -7.9  | 5.3  | -23.3 |
| C–C  | Pd                                                                 | -18.0 | 10.9 | -8.0  |
|      | Pd(PH <sub>3</sub> )                                               | -13.7 | 21.6 | 14.3  |
|      | Pd(PH <sub>3</sub> ) <sub>2</sub>                                  | 0.3   | 44.6 | 27.2  |
|      | Pd(PH <sub>2</sub> C <sub>2</sub> H <sub>4</sub> PH <sub>2</sub> ) | -4.0  | 31.1 | 1.4   |

[a] Computed at ZORA-BLYP/TZ2P

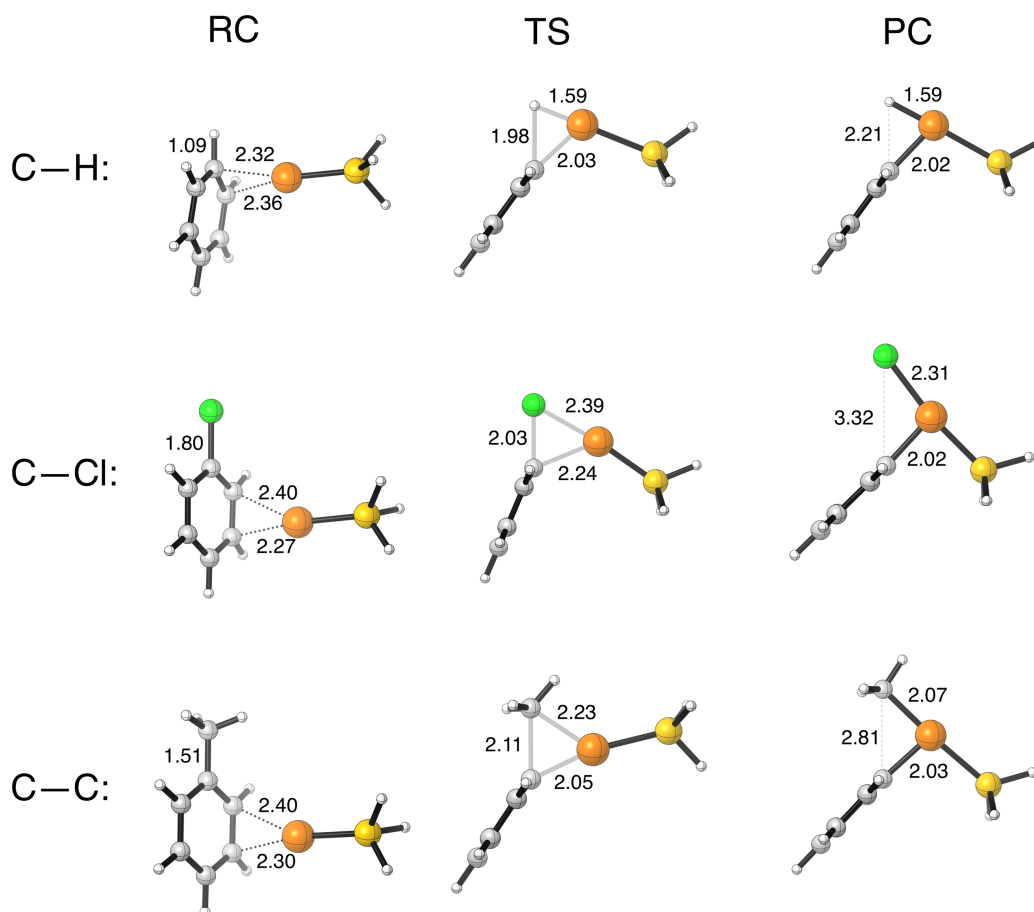

**Supplementary Figure 1.** Representative geometries of the stationary points (in Å) for the oxidative insertion of Pd(PH<sub>3</sub>) into the C—H, C—Cl, and C—C bond, computed at ZORA-BLYP/TZ2P.

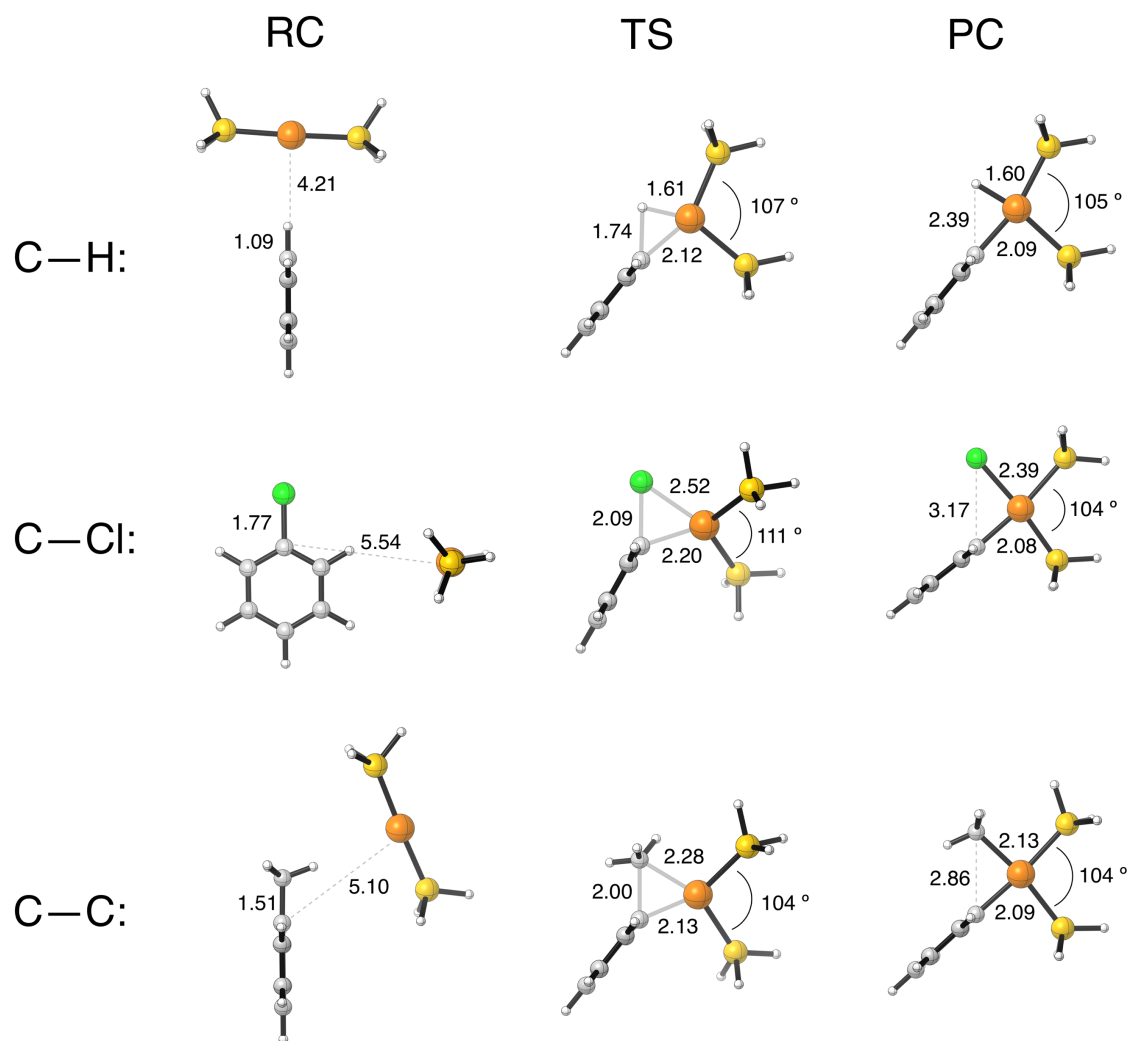

**Supplementary Figure 2.** Representative geometries of the stationary points (in Å) for the oxidative insertion of Pd(PH<sub>3</sub>)<sub>2</sub> into the C—H, C—Cl, and C—C bond, computed at ZORA-BLYP/TZ2P (for all RC: dashed line = Pd—C distance).

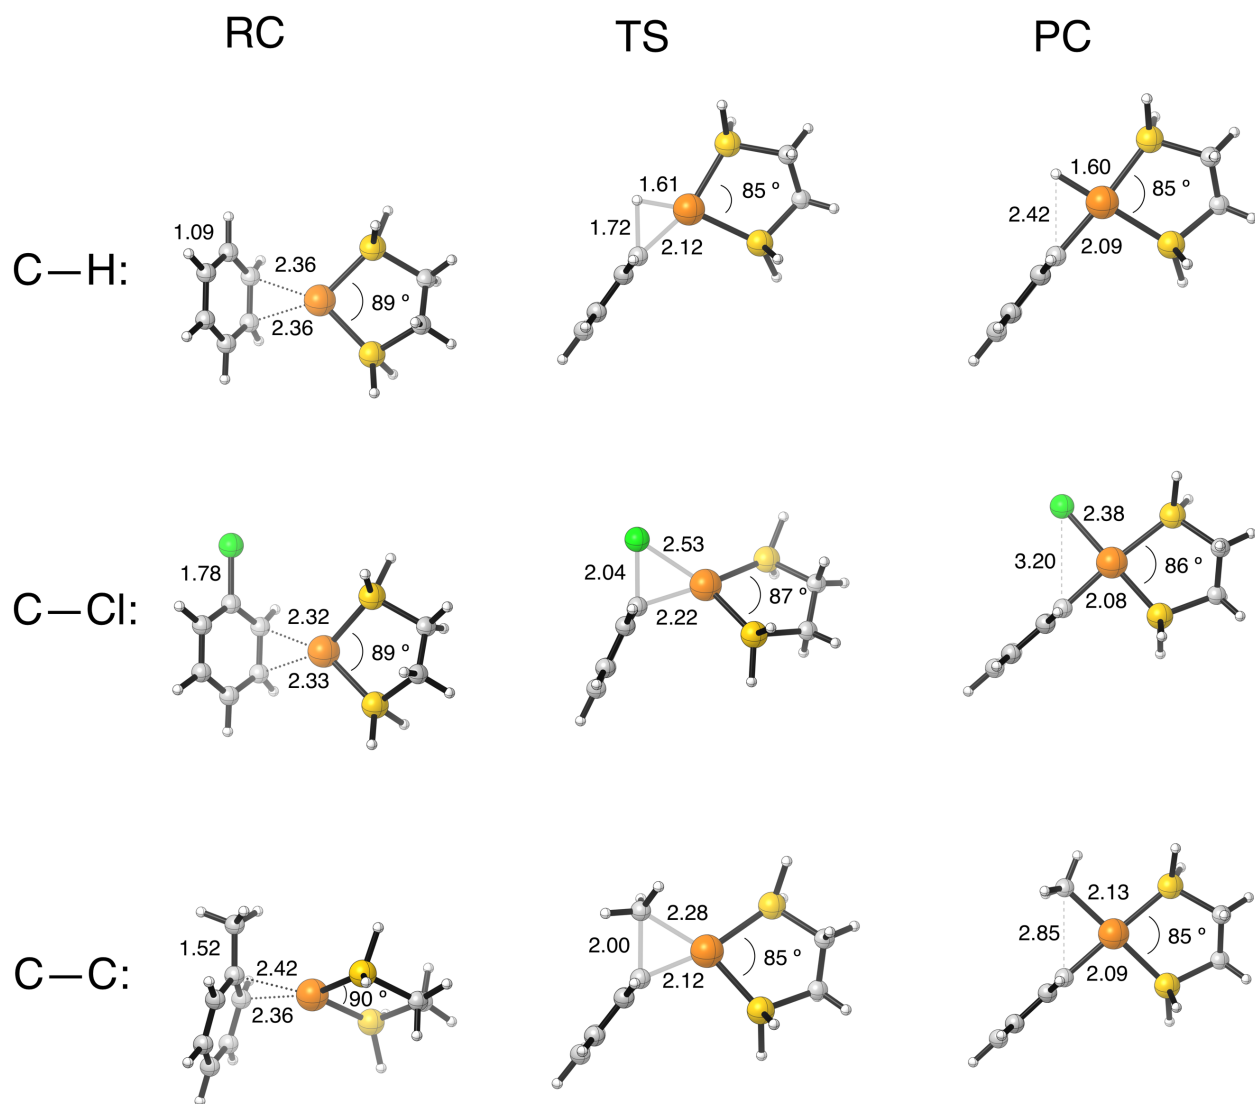

**Supplementary Figure 3.** Representative geometries of the stationary points (in Å) for the oxidative insertion of Pd(PH<sub>2</sub>C<sub>2</sub>H<sub>4</sub>PH<sub>2</sub>) into the C—H, C—Cl, and C—C bond, computed at ZORA-BLYP/TZ2P.

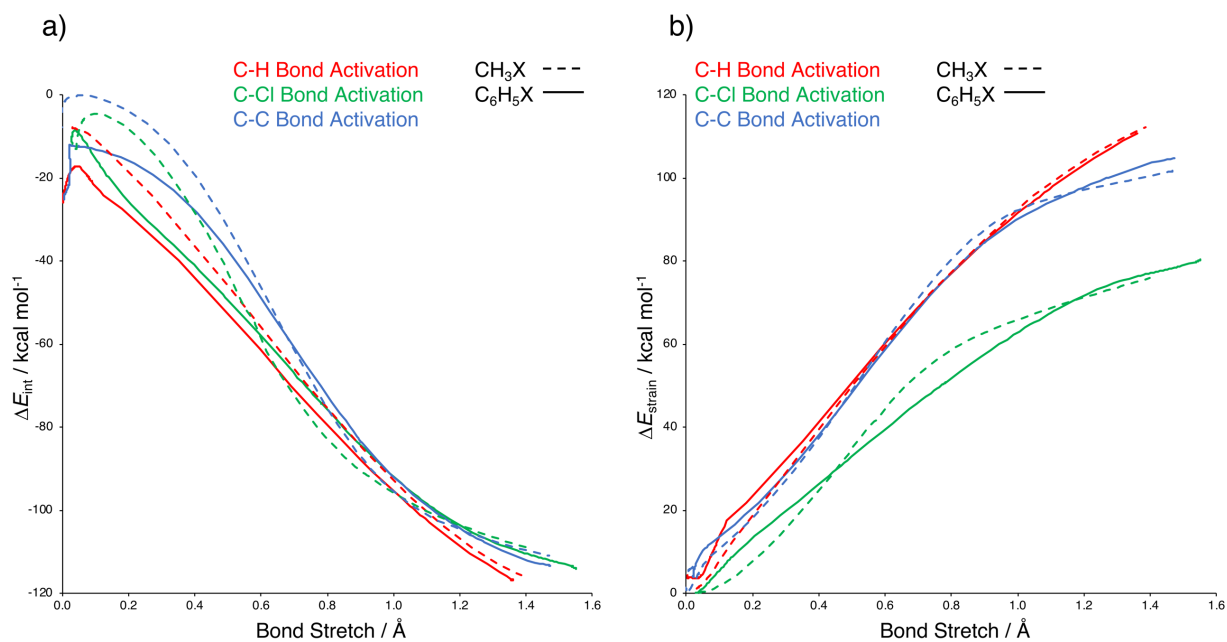

**Supplementary Figure 4.** Zoomed-in activation strain diagram of a) the strain energies and b) the interaction energies comparing the oxidative insertion of the aliphatic C–X bond versus the aryl C–X bond (X = H, Cl, CH<sub>3</sub>) by a Pd catalyst.

**Supplementary Table 2.** Cartesian coordinates (in Å) and ADF total bonding energies (in kcal mol<sup>-1</sup>) of all molecular species in this study, computed at ZORA-BLYP/TZ2P.

|                                                 |           |           |           |                                                                    |           |           |           |
|-------------------------------------------------|-----------|-----------|-----------|--------------------------------------------------------------------|-----------|-----------|-----------|
| <b>C<sub>6</sub>H<sub>6</sub></b>               |           |           |           | <b>[-1666.22]</b>                                                  |           |           |           |
| C                                               | 0.000000  | 0.000000  | 0.143795  | H                                                                  | -5.349774 | 1.281338  | -1.005637 |
| C                                               | 0.000000  | 1.212661  | -0.556419 | H                                                                  | -3.917430 | -0.249550 | -1.276962 |
| C                                               | 0.000000  | 1.212661  | -1.956702 |                                                                    |           |           |           |
| C                                               | 0.000000  | 0.000000  | -2.656917 | <b>Pd (PH<sub>2</sub>C<sub>2</sub>H<sub>4</sub>PH<sub>2</sub>)</b> |           |           |           |
| C                                               | 0.000000  | -1.212661 | -1.956702 | Pd                                                                 | -0.810546 | -1.342404 | -0.178152 |
| C                                               | 0.000000  | -1.212661 | -0.556419 | P                                                                  | 0.801185  | 0.257050  | -0.369941 |
| H                                               | 0.000000  | 2.155100  | -0.012392 | C                                                                  | -0.218989 | 1.760110  | 0.209723  |
| H                                               | 0.000000  | 2.155099  | -2.500733 | C                                                                  | -1.701812 | 1.712102  | -0.233869 |
| H                                               | 0.000000  | 0.000000  | -3.745193 | P                                                                  | -2.568749 | 0.063781  | 0.175341  |
| H                                               | 0.000000  | -2.155099 | -2.500733 | H                                                                  | 0.248727  | 2.687677  | -0.141348 |
| H                                               | 0.000000  | -2.155100 | -0.012392 | H                                                                  | -0.153322 | 1.755137  | 1.305522  |
| H                                               | 0.000000  | 0.000000  | 1.232070  | H                                                                  | -1.772459 | 1.818832  | -1.324154 |
|                                                 |           |           |           | H                                                                  | -2.255063 | 2.546926  | 0.212707  |
|                                                 |           |           |           | H                                                                  | 2.018413  | 0.602851  | 0.307682  |
|                                                 |           |           |           | H                                                                  | 1.238430  | 0.757607  | -1.639312 |
|                                                 |           |           |           | H                                                                  | -3.046252 | 0.380362  | 1.488628  |
|                                                 |           |           |           | H                                                                  | -3.817061 | 0.360607  | -0.467947 |
| <b>C<sub>6</sub>H<sub>5</sub>Cl</b>             |           |           |           | <b>[-1626.09]</b>                                                  |           |           |           |
| C                                               | 0.000000  | 0.000000  | -0.242718 | <b>RC: Pd + C<sub>6</sub>H<sub>6</sub></b>                         |           |           |           |
| C                                               | 0.000000  | 1.218777  | -0.926789 | C                                                                  | -0.341105 | -0.080778 | 1.821718  |
| C                                               | 0.000000  | 1.210300  | -2.326521 | C                                                                  | -1.627986 | 0.377569  | 1.368555  |
| C                                               | 0.000000  | 0.000000  | -3.029266 | C                                                                  | -2.532017 | -0.561162 | 0.790405  |
| C                                               | 0.000000  | -1.210300 | -2.326521 | C                                                                  | -2.166403 | -1.894589 | 0.641419  |
| C                                               | 0.000000  | -1.218777 | -0.926789 | C                                                                  | -0.903739 | -2.344706 | 1.086992  |
| H                                               | 0.000000  | 2.153879  | -0.374170 | C                                                                  | -0.009366 | -1.460214 | 1.679992  |
| H                                               | 0.000000  | 2.155766  | -2.864642 | H                                                                  | -1.810093 | 1.442753  | 1.229365  |
| H                                               | 0.000000  | 0.000000  | -4.116773 | H                                                                  | -3.497456 | -0.213530 | 0.428526  |
| H                                               | 0.000000  | -2.155766 | -2.864642 | H                                                                  | -2.854830 | -2.596093 | 0.174606  |
| H                                               | 0.000000  | -2.153879 | -0.374170 | H                                                                  | -0.628529 | -3.389745 | 0.960529  |
| Cl                                              | 0.000000  | 0.000000  | 1.530755  | H                                                                  | 0.970174  | -1.805584 | 2.004031  |
|                                                 |           |           |           | H                                                                  | 0.453255  | 0.636683  | 2.025276  |
|                                                 |           |           |           | Pd                                                                 | -1.652309 | 0.208961  | 3.564508  |
| <b>C<sub>6</sub>H<sub>5</sub>CH<sub>3</sub></b> |           |           |           | <b>[-2030.53]</b>                                                  |           |           |           |
| C                                               | -1.228226 | 0.829492  | -0.033507 | <b>TS: Pd + C<sub>6</sub>H<sub>6</sub></b>                         |           |           |           |
| C                                               | -2.434553 | 0.109475  | -0.071390 | C                                                                  | 0.092395  | -0.577941 | -0.209612 |
| C                                               | -2.441196 | -1.289409 | -0.045441 | C                                                                  | -1.145418 | -1.250158 | -0.153715 |
| C                                               | -1.235910 | -1.997692 | 0.017513  | C                                                                  | -1.182596 | -2.637364 | 0.033735  |
| C                                               | -0.026747 | -1.294222 | 0.052233  | C                                                                  | 0.005580  | -3.370740 | 0.135089  |
| C                                               | -0.025739 | 0.104818  | 0.026017  | C                                                                  | 1.237079  | -2.711825 | 0.039160  |
| H                                               | -3.378916 | 0.649894  | -0.124648 | C                                                                  | 1.286217  | -1.325058 | -0.148419 |
| H                                               | -3.387742 | -1.825634 | -0.078204 | H                                                                  | -2.074209 | -0.694654 | -0.251062 |
| H                                               | -1.238786 | -3.085518 | 0.034643  | H                                                                  | -2.144113 | -3.144759 | 0.091608  |
| H                                               | 0.917240  | -1.834206 | 0.095824  | H                                                                  | -0.027919 | -4.449458 | 0.273564  |
| H                                               | 0.921949  | 0.641442  | 0.049194  | H                                                                  | 2.165274  | -3.277354 | 0.101500  |
| C                                               | -1.225883 | 2.346111  | -0.030474 | H                                                                  | 2.247907  | -0.827890 | -0.241578 |
| H                                               | -0.311102 | 2.745753  | -0.482841 | Pd                                                                 | 0.154496  | 1.421045  | 0.044451  |
| H                                               | -1.282007 | 2.737517  | 0.995349  | H                                                                  | 0.132305  | 0.665364  | -1.344002 |
| H                                               | -2.084044 | 2.748698  | -0.580681 | <b>Pd (d<sup>10</sup>s<sup>0</sup>)</b>                            |           |           |           |
|                                                 |           |           |           | <b>[0.00]</b>                                                      |           |           |           |
| <b>Pd (PH<sub>3</sub>)</b>                      |           |           |           | <b>[-382.57]</b>                                                   |           |           |           |
| Pd                                              | 0.000000  | 0.000000  | -1.109814 | <b>PC: Pd + C<sub>6</sub>H<sub>6</sub></b>                         |           |           |           |
| P                                               | 0.000000  | 0.000000  | 1.065827  | C                                                                  | 0.092694  | -0.564821 | -0.106681 |
| H                                               | -0.611742 | -1.059568 | 1.800681  | C                                                                  | -1.146774 | -1.226357 | -0.080895 |
| H                                               | 1.223484  | 0.000000  | 1.800681  | C                                                                  | -1.182925 | -2.624427 | 0.023104  |
| H                                               | -0.611742 | 1.059568  | 1.800681  | C                                                                  | 0.005110  | -3.362164 | 0.076427  |
|                                                 |           |           |           | C                                                                  | 1.236908  | -2.700176 | 0.020662  |
|                                                 |           |           |           | C                                                                  | 1.288354  | -1.302628 | -0.083481 |
| <b>Pd (PH<sub>3</sub>)<sub>2</sub></b>          |           |           |           | <b>[-754.24]</b>                                                   |           |           |           |
| Pd                                              | -2.441975 | 2.361091  | 0.000259  | H                                                                  | -2.076439 | -0.666499 | -0.138606 |
| P                                               | -0.760661 | 3.853019  | 0.412772  | H                                                                  | -2.145062 | -3.133038 | 0.053974  |
| H                                               | -0.257945 | 4.051999  | 1.732433  | H                                                                  | -0.028750 | -4.447230 | 0.149682  |
| H                                               | 0.517080  | 3.712934  | -0.204962 | H                                                                  | 2.165335  | -3.268046 | 0.049661  |
| H                                               | -0.912293 | 5.238301  | 0.109730  | H                                                                  | 2.251219  | -0.802169 | -0.143217 |
| P                                               | -4.120924 | 0.866507  | -0.412755 | Pd                                                                 | 0.154273  | 1.402595  | 0.028809  |
| H                                               | -4.719477 | 0.119036  | 0.643984  | H                                                                  | 0.155094  | 1.425426  | -1.518418 |

|                                                          |           |                   |                   |                                                            |           |           |                   |
|----------------------------------------------------------|-----------|-------------------|-------------------|------------------------------------------------------------|-----------|-----------|-------------------|
| <b>RC: Pd + C<sub>6</sub>H<sub>5</sub>Cl</b>             |           |                   | <b>[-1637.74]</b> | H                                                          | 0.599601  | -1.300034 | 0.534798          |
| C                                                        | -0.349156 | -1.297321         | -0.175727         | H                                                          | 0.947374  | 1.039187  | -0.183927         |
| C                                                        | -1.579926 | -1.897800         | 0.091467          | Pd                                                         | -1.066770 | 3.386284  | 0.077980          |
| C                                                        | -1.593747 | -3.221966         | 0.545884          | C                                                          | -0.804780 | 2.732001  | -2.000546         |
| C                                                        | -0.395151 | -3.922606         | 0.725236          | H                                                          | -0.684992 | 3.832345  | -2.079240         |
| C                                                        | 0.826759  | -3.296923         | 0.449373          | H                                                          | -1.653041 | 2.428823  | -2.611110         |
| C                                                        | 0.859344  | -1.973848         | -0.006064         | H                                                          | 0.114899  | 2.256550  | -2.336032         |
| H                                                        | -2.504117 | -1.345731         | -0.054888         |                                                            |           |           |                   |
| H                                                        | -2.546303 | -3.702986         | 0.757691          |                                                            |           |           |                   |
| H                                                        | -0.412975 | -4.951446         | 1.076908          | <b>PC: Pd + C<sub>6</sub>H<sub>5</sub>CH<sub>3</sub></b>   |           |           | <b>[-2039.07]</b> |
| H                                                        | 1.761425  | -3.836462         | 0.587008          | C                                                          | -1.230668 | 1.375719  | -0.085123         |
| H                                                        | 1.801175  | -1.480073         | -0.228306         | C                                                          | -2.488862 | 0.787854  | -0.301997         |
| Cl                                                       | -0.321816 | 0.421194          | -0.725292         | C                                                          | -2.641645 | -0.599623 | -0.167992         |
| Pd                                                       | -0.155686 | 0.767376          | -3.035138         | C                                                          | -1.545524 | -1.405087 | 0.162013          |
|                                                          |           |                   |                   | C                                                          | -0.289208 | -0.820515 | 0.356367          |
|                                                          |           |                   |                   | C                                                          | -0.123293 | 0.566193  | 0.223806          |
| <b>TS: Pd + C<sub>6</sub>H<sub>5</sub>Cl</b>             |           | <b>[-1634.14]</b> |                   | H                                                          | -3.347625 | 1.398602  | -0.568137         |
| C                                                        | -0.951689 | 0.071017          | 0.775698          | H                                                          | -3.621074 | -1.047698 | -0.327832         |
| C                                                        | -2.312597 | -0.256241         | 0.716082          | H                                                          | -1.667964 | -2.481923 | 0.258416          |
| C                                                        | -2.671761 | -1.562686         | 0.367578          | H                                                          | 0.570979  | -1.440579 | 0.603749          |
| C                                                        | -1.691827 | -2.516157         | 0.063235          | H                                                          | 0.862591  | 1.002929  | 0.362506          |
| C                                                        | -0.338452 | -2.157470         | 0.103401          | Pd                                                         | -1.029489 | 3.341523  | -0.026831         |
| C                                                        | 0.045377  | -0.857243         | 0.448994          | C                                                          | -0.893100 | 3.616289  | -2.038074         |
| H                                                        | -3.066962 | 0.490788          | 0.943112          | H                                                          | -0.749158 | 4.703552  | -2.122378         |
| H                                                        | -3.725724 | -1.830073         | 0.330579          | H                                                          | -1.821597 | 3.302387  | -2.521218         |
| H                                                        | -1.980753 | -3.527750         | -0.211358         | H                                                          | -0.033325 | 3.072895  | -2.436639         |
| H                                                        | 0.429106  | -2.888996         | -0.140208         |                                                            |           |           |                   |
| H                                                        | 1.091922  | -0.569120         | 0.471568          | <b>RC: Pd(PH<sub>3</sub>) + C<sub>6</sub>H<sub>6</sub></b> |           |           | <b>[-2063.71]</b> |
| Cl                                                       | -0.478054 | 1.801573          | 1.062011          | C                                                          | -0.110812 | -0.161665 | 2.387936          |
| Pd                                                       | -0.460577 | 0.894043          | 3.302567          | C                                                          | -0.283685 | 0.644183  | 1.263317          |
|                                                          |           |                   |                   | C                                                          | -1.019243 | 0.173669  | 0.160053          |
|                                                          |           |                   |                   | C                                                          | -1.576069 | -1.104436 | 0.180769          |
| <b>PC: Pd + C<sub>6</sub>H<sub>5</sub>Cl</b>             |           | <b>[-1659.86]</b> |                   | C                                                          | -1.381237 | -1.950891 | 1.300493          |
| C                                                        | 0.019635  | 0.509587          | 0.153100          | C                                                          | -0.645211 | -1.471917 | 2.416373          |
| C                                                        | -1.162989 | -0.134413         | -0.230665         | H                                                          | 0.148883  | 1.642153  | 1.239597          |
| C                                                        | -1.112345 | -1.509541         | -0.512801         | H                                                          | -1.154305 | 0.809613  | -0.712198         |
| C                                                        | 0.083912  | -2.217364         | -0.356156         | H                                                          | -2.136282 | -1.472622 | -0.675603         |
| C                                                        | 1.239877  | -1.559984         | 0.083535          | H                                                          | -1.666346 | -2.999630 | 1.240255          |
| C                                                        | 1.214667  | -0.185774         | 0.362897          | H                                                          | -0.372959 | -2.147588 | 3.224181          |
| H                                                        | -2.104893 | 0.404331          | -0.310260         | H                                                          | 0.459650  | 0.201022  | 3.239987          |
| H                                                        | -2.018463 | -2.021160         | -0.831225         | Pd                                                         | -2.949923 | -1.320836 | 2.885482          |
| H                                                        | 0.110861  | -3.286367         | -0.555757         | P                                                          | -4.803377 | -1.073493 | 4.114530          |
| H                                                        | 2.166799  | -2.113486         | 0.220940          | H                                                          | -5.228828 | -2.098331 | 5.012517          |
| H                                                        | 2.104012  | 0.322562          | 0.723854          | H                                                          | -4.950040 | -0.006592 | 5.051912          |
| Pd                                                       | -0.032386 | 2.452562          | 0.097008          | H                                                          | -6.083433 | -0.888575 | 3.509309          |
| Cl                                                       | 0.334842  | 3.060468          | 2.248507          |                                                            |           |           |                   |
|                                                          |           |                   |                   |                                                            |           |           |                   |
|                                                          |           |                   |                   |                                                            |           |           |                   |
| <b>RC: Pd + C<sub>6</sub>H<sub>5</sub>CH<sub>3</sub></b> |           | <b>[-2050.26]</b> |                   | <b>TS: Pd(PH<sub>3</sub>) + C<sub>6</sub>H<sub>6</sub></b> |           |           | <b>[-2031.73]</b> |
| C                                                        | -1.762009 | -0.580511         | 0.500038          | C                                                          | 0.104557  | -0.538620 | -0.238077         |
| C                                                        | -2.955591 | -1.350710         | 0.316353          | C                                                          | -1.145457 | -1.173333 | -0.167430         |
| C                                                        | -2.920985 | -2.738320         | 0.226140          | C                                                          | -1.215542 | -2.552197 | 0.079915          |
| C                                                        | -1.701736 | -3.436643         | 0.357735          | C                                                          | -0.047264 | -3.308645 | 0.224324          |
| C                                                        | -0.526029 | -2.736432         | 0.604073          | C                                                          | 1.197313  | -2.678956 | 0.112777          |
| C                                                        | -0.528586 | -1.311686         | 0.678995          | C                                                          | 1.278791  | -1.300708 | -0.134315         |
| H                                                        | -3.898628 | -0.822650         | 0.181973          | H                                                          | -2.062774 | -0.604563 | -0.294651         |
| H                                                        | -3.843115 | -3.288619         | 0.050276          | H                                                          | -2.190525 | -3.032352 | 0.149375          |
| H                                                        | -1.684195 | -4.521085         | 0.274900          | H                                                          | -0.106017 | -4.379432 | 0.408318          |
| H                                                        | 0.419426  | -3.266121         | 0.701373          | H                                                          | 2.114328  | -3.258513 | 0.208183          |
| H                                                        | 0.421569  | -0.782317         | 0.603043          | H                                                          | 2.253840  | -0.831440 | -0.235540         |
| C                                                        | -1.757755 | 0.889732          | 0.101683          | Pd                                                         | 0.211228  | 1.490488  | -0.209860         |
| H                                                        | -0.869018 | 1.410405          | 0.470701          | H                                                          | 0.193843  | 0.835971  | -1.660394         |
| H                                                        | -2.643578 | 1.409167          | 0.484768          | H                                                          | 0.236520  | 2.473762  | 1.980386          |
| H                                                        | -1.770867 | 0.982419          | -0.995102         | P                                                          | -0.842499 | 2.234109  | 2.878272          |
| Pd                                                       | -1.286842 | -0.766066         | 2.663645          | H                                                          | 1.278275  | 2.149177  | 2.895429          |
|                                                          |           |                   |                   | H                                                          | 0.291425  | 3.884316  | 2.189445          |
|                                                          |           |                   |                   |                                                            |           |           |                   |
|                                                          |           |                   |                   |                                                            |           |           |                   |
| <b>TS: Pd + C<sub>6</sub>H<sub>5</sub>CH<sub>3</sub></b> |           | <b>[-2019.51]</b> |                   | <b>PC: Pd(PH<sub>3</sub>) + C<sub>6</sub>H<sub>6</sub></b> |           |           | <b>[-2031.92]</b> |
| C                                                        | -1.161243 | 1.445547          | -0.508389         | C                                                          | 0.107181  | -0.489488 | -0.174339         |
| C                                                        | -2.453237 | 0.871408          | -0.507934         | C                                                          | -1.143560 | -1.117933 | -0.087596         |
| C                                                        | -2.639769 | -0.456434         | -0.108580         | C                                                          | -1.214497 | -2.497192 | 0.161008          |
| C                                                        | -1.545725 | -1.243806         | 0.271676          | C                                                          | -0.046817 | -3.255495 | 0.298474          |
| C                                                        | -0.258052 | -0.693219         | 0.248947          | C                                                          | 1.198145  | -2.628189 | 0.180309          |
| C                                                        | -0.061122 | 0.633911          | -0.147722         | C                                                          | 1.280951  | -1.249621 | -0.068148         |
| H                                                        | -3.309441 | 1.462014          | -0.825003         | H                                                          | -2.061116 | -0.548051 | -0.208781         |
| H                                                        | -3.643803 | -0.877662         | -0.101260         | H                                                          | -2.190115 | -2.975074 | 0.237132          |
| H                                                        | -1.693755 | -2.279111         | 0.571130          |                                                            |           |           |                   |



|    |           |           |           |
|----|-----------|-----------|-----------|
| H  | -0.106428 | -4.325943 | 0.484082  |
| H  | 2.114870  | -3.208896 | 0.271486  |
| H  | 2.256668  | -0.782644 | -0.174300 |
| Pd | 0.216354  | 1.526344  | -0.276779 |
| H  | 0.210315  | 1.021721  | -1.784554 |
| P  | 0.217511  | 2.246022  | 2.026018  |
| H  | -0.859622 | 1.863510  | 2.875361  |
| H  | 1.262471  | 1.821805  | 2.895848  |
| H  | 0.241170  | 3.617024  | 2.421836  |

**RC: Pd(PH<sub>3</sub>)<sub>2</sub> + C<sub>6</sub>H<sub>6</sub> [-2420.86]**

|    |           |           |           |
|----|-----------|-----------|-----------|
| C  | -1.402965 | -2.053906 | -0.102300 |
| C  | -0.311923 | -2.921878 | 0.029462  |
| C  | 0.113279  | -3.686189 | -1.064155 |
| C  | -0.552531 | -3.582718 | -2.291708 |
| C  | -1.643739 | -2.715224 | -2.424547 |
| C  | -2.068242 | -1.951414 | -1.330290 |
| H  | 0.205625  | -3.001818 | 0.983586  |
| H  | 0.961175  | -4.360635 | -0.960379 |
| H  | -0.222213 | -4.176132 | -3.142059 |
| H  | -2.161583 | -2.634664 | -3.378483 |
| H  | -2.916080 | -1.276810 | -1.433366 |
| H  | -1.732464 | -1.458733 | 0.749176  |
| H  | -5.102965 | -1.744623 | 3.129605  |
| H  | -4.812213 | -1.013274 | 5.093128  |
| H  | -3.551154 | -2.531109 | 4.331262  |
| Pd | -2.601818 | 0.352059  | 3.134298  |
| P  | -1.191068 | 1.995959  | 2.399089  |
| H  | 0.214947  | 1.777073  | 2.309377  |
| H  | -1.329736 | 2.563895  | 1.098729  |
| H  | -1.099222 | 3.239667  | 3.090053  |
| P  | -4.028461 | -1.250120 | 3.925978  |

**TS: Pd(PH<sub>3</sub>)<sub>2</sub> + C<sub>6</sub>H<sub>6</sub> [-2393.70]**

|    |           |           |           |
|----|-----------|-----------|-----------|
| C  | -0.052944 | -0.503641 | -0.305974 |
| C  | -1.200252 | -1.284446 | -0.065227 |
| C  | -1.091261 | -2.641683 | 0.265936  |
| C  | 0.165316  | -3.253931 | 0.338540  |
| C  | 1.311587  | -2.496874 | 0.070136  |
| C  | 1.203115  | -1.139585 | -0.260960 |
| H  | -2.189189 | -0.834992 | -0.133253 |
| H  | -1.992709 | -3.221840 | 0.459013  |
| H  | 0.249353  | -4.309662 | 0.588597  |
| H  | 2.295007  | -2.963540 | 0.109826  |
| H  | 2.107333  | -0.575936 | -0.482977 |
| Pd | -0.189058 | 1.609259  | -0.410844 |
| H  | -0.226036 | 0.584056  | -1.649335 |
| P  | -0.038574 | 2.134927  | 1.935047  |
| H  | -1.005293 | 1.549580  | 2.804434  |
| H  | 1.099780  | 1.655773  | 2.647473  |
| H  | -0.057035 | 3.422034  | 2.559197  |
| P  | -0.405167 | 3.650947  | -1.556466 |
| H  | -1.560075 | 3.859974  | -2.365247 |
| H  | -0.412525 | 4.958297  | -0.976353 |
| H  | 0.539075  | 3.965826  | -2.576609 |

**PC: Pd(PH<sub>3</sub>)<sub>2</sub> + C<sub>6</sub>H<sub>6</sub> [-2396.21]**

|    |           |           |           |
|----|-----------|-----------|-----------|
| C  | -0.043980 | -0.453085 | -0.169976 |
| C  | -1.190685 | -1.240253 | 0.045207  |
| C  | -1.087080 | -2.612565 | 0.317569  |
| C  | 0.167577  | -3.229695 | 0.371529  |
| C  | 1.316186  | -2.462595 | 0.147725  |
| C  | 1.210096  | -1.090362 | -0.124328 |
| H  | -2.181207 | -0.790348 | -0.003203 |
| H  | -1.990849 | -3.198615 | 0.481229  |
| H  | 0.248749  | -4.295119 | 0.578667  |
| H  | 2.299440  | -2.930864 | 0.178340  |
| H  | 2.120780  | -0.521714 | -0.306588 |
| Pd | -0.196297 | 1.605844  | -0.495964 |
| H  | -0.283759 | 1.065559  | -1.995735 |
| P  | -0.025457 | 1.947511  | 1.867027  |
| H  | -0.984673 | 1.292101  | 2.688461  |
| H  | 1.128847  | 1.426750  | 2.515836  |
| H  | -0.048604 | 3.197651  | 2.558892  |

|   |           |          |           |
|---|-----------|----------|-----------|
| P | -0.408490 | 3.750264 | -1.421470 |
| H | -1.560190 | 4.014321 | -2.214323 |
| H | -0.426967 | 4.989467 | -0.709097 |
| H | 0.550562  | 4.149119 | -2.394101 |

**RC: Pd(PH<sub>2</sub>C<sub>2</sub>H<sub>4</sub>PH<sub>2</sub>) + C<sub>6</sub>H<sub>6</sub> [-2971.49]**

|    |           |           |           |
|----|-----------|-----------|-----------|
| Pd | 2.429804  | 0.318515  | 0.397763  |
| P  | 1.203361  | 2.216119  | -0.200194 |
| C  | -0.572086 | 1.587341  | -0.458103 |
| C  | -0.600023 | 0.165469  | -1.058920 |
| P  | 0.589897  | -1.011895 | -0.157308 |
| H  | -1.139333 | 2.283232  | -1.085818 |
| H  | -1.037314 | 1.586346  | 0.536591  |
| H  | -0.262962 | 0.189289  | -2.103742 |
| H  | -1.618844 | -0.237151 | -1.050805 |
| H  | 0.870911  | 3.436323  | 0.475679  |
| H  | 1.404213  | 2.845284  | -1.471466 |
| H  | -0.303701 | -1.497558 | 0.851794  |
| H  | 0.413125  | -2.146600 | -1.016325 |
| C  | 5.494150  | 1.232876  | 0.323141  |
| C  | 4.601645  | 0.640727  | 1.261776  |
| C  | 4.365974  | -0.766455 | 1.203758  |
| C  | 5.028550  | -1.539378 | 0.207897  |
| C  | 5.884524  | -0.937124 | -0.700085 |
| C  | 6.119541  | 0.459932  | -0.641909 |
| H  | 4.300480  | 1.209531  | 2.138728  |
| H  | 3.885380  | -1.274684 | 2.036713  |
| H  | 4.869194  | -2.615552 | 0.179923  |
| H  | 6.392244  | -1.539048 | -1.451059 |
| H  | 6.806078  | 0.921825  | -1.348632 |
| H  | 5.694344  | 2.300883  | 0.384289  |

**TS: Pd(PH<sub>2</sub>C<sub>2</sub>H<sub>4</sub>PH<sub>2</sub>) + C<sub>6</sub>H<sub>6</sub> [-2950.21]**

|    |           |           |           |
|----|-----------|-----------|-----------|
| C  | -1.944662 | 0.403507  | 0.102834  |
| C  | -3.154766 | -0.194114 | -0.301070 |
| C  | -3.441361 | -1.528209 | 0.016719  |
| C  | -2.536994 | -2.287044 | 0.769055  |
| C  | -1.346447 | -1.694814 | 1.206747  |
| C  | -1.059884 | -0.360738 | 0.889168  |
| H  | -3.881383 | 0.380608  | -0.872547 |
| H  | -4.378079 | -1.971586 | -0.318799 |
| H  | -2.762762 | -3.321224 | 1.021797  |
| H  | -0.639469 | -2.269014 | 1.804388  |
| H  | -0.135693 | 0.082588  | 1.255282  |
| Pd | -1.329129 | 2.251655  | -0.727675 |
| H  | -2.132773 | 2.018780  | 0.653621  |
| P  | -0.978789 | 4.541073  | -1.104666 |
| C  | 0.280919  | 4.758550  | -2.504292 |
| C  | 0.108661  | 3.658302  | -3.574910 |
| P  | -0.091697 | 1.952174  | -2.770861 |
| H  | 1.271047  | 4.680696  | -2.036554 |
| H  | 0.204351  | 5.755774  | -2.950584 |
| H  | 0.946839  | 3.663633  | -4.279584 |
| H  | -0.809390 | 3.830872  | -4.151781 |
| H  | -0.411820 | 1.188052  | -3.934430 |
| H  | 1.277373  | 1.547060  | -2.712241 |
| H  | -2.042787 | 5.358096  | -1.594462 |
| H  | -0.473236 | 5.502913  | -0.181175 |

**PC: Pd(PH<sub>2</sub>C<sub>2</sub>H<sub>4</sub>PH<sub>2</sub>) + C<sub>6</sub>H<sub>6</sub> [-2953.86]**

|    |           |           |           |
|----|-----------|-----------|-----------|
| C  | -1.863052 | 0.391629  | -0.042250 |
| C  | -3.063743 | -0.212208 | -0.459589 |
| C  | -3.364228 | -1.540623 | -0.122819 |
| C  | -2.472020 | -2.293599 | 0.648803  |
| C  | -1.279423 | -1.703517 | 1.081964  |
| C  | -0.982074 | -0.374798 | 0.743362  |
| H  | -3.783816 | 0.351790  | -1.050932 |
| H  | -4.301106 | -1.982998 | -0.460291 |
| H  | -2.706026 | -3.322923 | 0.914648  |
| H  | -0.578236 | -2.273962 | 1.690481  |
| H  | -0.051627 | 0.060198  | 1.105688  |
| Pd | -1.375105 | 2.333583  | -0.632185 |
| H  | -2.156433 | 2.665731  | 0.723581  |
| P  | -0.933620 | 4.562890  | -1.182885 |

|   |           |          |           |
|---|-----------|----------|-----------|
| C | 0.315879  | 4.624961 | -2.603812 |
| C | 0.091116  | 3.448013 | -3.578964 |
| P | -0.173668 | 1.830862 | -2.631458 |
| H | 1.307583  | 4.549914 | -2.139468 |
| H | 0.268588  | 5.585500 | -3.127844 |
| H | 0.923742  | 3.358002 | -4.284557 |
| H | -0.822932 | 3.609189 | -4.164955 |
| H | -0.586553 | 0.973324 | -3.692378 |
| H | 1.165563  | 1.345101 | -2.548003 |
| H | -1.980005 | 5.380510 | -1.704130 |
| H | -0.383624 | 5.544871 | -0.310221 |

|                                                              |           |           |           |
|--------------------------------------------------------------|-----------|-----------|-----------|
| <b>RC: Pd(PH<sub>3</sub>) + C<sub>6</sub>H<sub>5</sub>Cl</b> |           |           |           |
| <b>[-2020.59]</b>                                            |           |           |           |
| C                                                            | -0.531676 | -1.295112 | -0.151231 |
| C                                                            | -0.763882 | -1.617990 | 1.185581  |
| C                                                            | -0.488207 | -2.922967 | 1.612229  |
| C                                                            | 0.007355  | -3.873318 | 0.712235  |
| C                                                            | 0.230173  | -3.520211 | -0.623572 |
| C                                                            | -0.039078 | -2.220689 | -1.069269 |
| H                                                            | -1.148833 | -0.873410 | 1.876688  |
| H                                                            | -0.663522 | -3.190967 | 2.651730  |
| H                                                            | 0.218975  | -4.884833 | 1.050676  |
| H                                                            | 0.615140  | -4.254441 | -1.327752 |
| H                                                            | 0.126504  | -1.923745 | -2.102634 |
| Cl                                                           | -0.886864 | 0.383430  | -0.688670 |
| Pd                                                           | -0.427853 | 0.748374  | -3.066559 |
| P                                                            | -0.070669 | 1.238382  | -5.183716 |
| H                                                            | 0.270004  | 0.222168  | -6.127105 |
| H                                                            | -1.088158 | 1.834849  | -5.988265 |
| H                                                            | 0.962276  | 2.141401  | -5.579299 |

|                                                              |           |           |           |
|--------------------------------------------------------------|-----------|-----------|-----------|
| <b>TS: Pd(PH<sub>3</sub>) + C<sub>6</sub>H<sub>5</sub>Cl</b> |           |           |           |
| <b>[-2013.09]</b>                                            |           |           |           |
| C                                                            | 0.096303  | 0.393705  | 0.675302  |
| C                                                            | -1.142452 | -0.203505 | 0.394537  |
| C                                                            | -1.154941 | -1.458056 | -0.225347 |
| C                                                            | 0.041741  | -2.126232 | -0.515441 |
| C                                                            | 1.264885  | -1.535536 | -0.172529 |
| C                                                            | 1.305469  | -0.282129 | 0.448415  |
| H                                                            | -2.069245 | 0.305089  | 0.640523  |
| H                                                            | -2.111272 | -1.915211 | -0.472232 |
| H                                                            | 0.020606  | -3.105731 | -0.986964 |
| H                                                            | 2.200017  | -2.052977 | -0.378305 |
| H                                                            | 2.251171  | 0.166336  | 0.735777  |
| Pd                                                           | 0.181646  | 2.517951  | -0.040937 |
| Cl                                                           | 0.104108  | 1.717445  | 2.208993  |
| P                                                            | 0.255286  | 3.068173  | -2.227752 |
| H                                                            | -0.792000 | 2.659487  | -3.104036 |
| H                                                            | 0.305856  | 4.419049  | -2.685107 |
| H                                                            | 1.324929  | 2.600381  | -3.045660 |

|                                                              |           |           |           |
|--------------------------------------------------------------|-----------|-----------|-----------|
| <b>PC: Pd(PH<sub>3</sub>) + C<sub>6</sub>H<sub>5</sub>Cl</b> |           |           |           |
| <b>[-2032.50]</b>                                            |           |           |           |
| C                                                            | 0.118751  | 0.443137  | -0.163552 |
| C                                                            | -1.119130 | -0.198963 | -0.253653 |
| C                                                            | -1.151252 | -1.596350 | -0.387761 |
| C                                                            | 0.036721  | -2.332750 | -0.432633 |
| C                                                            | 1.265856  | -1.672411 | -0.338451 |
| C                                                            | 1.316368  | -0.275646 | -0.203802 |
| H                                                            | -2.049185 | 0.360731  | -0.204482 |
| H                                                            | -2.113812 | -2.100784 | -0.450041 |
| H                                                            | 0.004760  | -3.415290 | -0.534263 |
| H                                                            | 2.196475  | -2.236389 | -0.362145 |
| H                                                            | 2.277085  | 0.224448  | -0.115664 |
| Pd                                                           | 0.175670  | 2.437094  | 0.132381  |
| Cl                                                           | 0.121898  | 2.521247  | 2.430988  |
| P                                                            | 0.235557  | 2.666334  | -2.120465 |
| H                                                            | -0.830792 | 2.150028  | -2.906402 |
| H                                                            | 0.284000  | 3.973301  | -2.683609 |
| H                                                            | 1.308059  | 2.092502  | -2.856513 |

|                                                                          |           |           |          |
|--------------------------------------------------------------------------|-----------|-----------|----------|
| <b>RC: Pd(PH<sub>3</sub>)<sub>2</sub> + C<sub>6</sub>H<sub>5</sub>Cl</b> |           |           |          |
| <b>[-2380.76]</b>                                                        |           |           |          |
| C                                                                        | -0.854390 | -1.030832 | 0.917424 |
| C                                                                        | -0.854133 | -2.123900 | 1.788592 |

|    |           |           |           |
|----|-----------|-----------|-----------|
| C  | -0.518153 | -3.387914 | 1.289648  |
| C  | -0.187858 | -3.552826 | -0.060459 |
| C  | -0.194099 | -2.445691 | -0.916367 |
| C  | -0.527615 | -1.174751 | -0.433451 |
| H  | -1.111626 | -1.987036 | 2.835020  |
| H  | -0.516053 | -4.242830 | 1.962674  |
| H  | 0.072372  | -4.537409 | -0.442185 |
| H  | 0.059858  | -2.559446 | -1.968053 |
| H  | -0.532531 | -0.316334 | -1.100584 |
| Cl | -1.280039 | 0.574514  | 1.543511  |
| Pd | -0.102982 | 0.594246  | -4.327727 |
| P  | -2.315878 | 0.175704  | -4.728024 |
| H  | -2.804671 | -1.156296 | -4.869441 |
| H  | -3.324303 | 0.601995  | -3.815061 |
| H  | -2.952843 | 0.686745  | -5.896613 |
| P  | 2.108548  | 1.041613  | -3.955224 |
| H  | 3.065365  | -0.007482 | -3.823946 |
| H  | 2.863223  | 1.806838  | -4.891949 |
| H  | 2.531650  | 1.765944  | -2.802524 |

|                                                                          |           |           |           |
|--------------------------------------------------------------------------|-----------|-----------|-----------|
| <b>TS: Pd(PH<sub>3</sub>)<sub>2</sub> + C<sub>6</sub>H<sub>5</sub>Cl</b> |           |           |           |
| <b>[-2361.14]</b>                                                        |           |           |           |
| C                                                                        | -0.137384 | 0.543479  | 0.470805  |
| C                                                                        | -1.008661 | -0.434109 | -0.046367 |
| C                                                                        | -0.469124 | -1.609546 | -0.569217 |
| C                                                                        | 0.916985  | -1.841951 | -0.541655 |
| C                                                                        | 1.762545  | -0.890242 | 0.034976  |
| C                                                                        | 1.242250  | 0.294084  | 0.578723  |
| H                                                                        | -2.081450 | -0.263671 | -0.053545 |
| H                                                                        | -1.138282 | -2.353216 | -0.998784 |
| H                                                                        | 1.324027  | -2.767837 | -0.940830 |
| H                                                                        | 2.834303  | -1.071769 | 0.093121  |
| H                                                                        | 1.894188  | 1.002938  | 1.081083  |
| Pd                                                                       | -0.255511 | 2.656137  | -0.140905 |
| Cl                                                                       | -0.911924 | 1.646906  | 2.069633  |
| P                                                                        | -0.927530 | 2.361092  | -2.371938 |
| H                                                                        | -2.021584 | 1.506749  | -2.716128 |
| H                                                                        | -1.322243 | 3.436494  | -3.225628 |
| H                                                                        | -0.021048 | 1.781330  | -3.310506 |
| P                                                                        | 0.566281  | 4.892361  | 0.232027  |
| H                                                                        | 0.084964  | 6.021466  | -0.497489 |
| H                                                                        | 0.477891  | 5.524775  | 1.510104  |
| H                                                                        | 1.946433  | 5.200035  | 0.029547  |

|                                                                          |           |           |           |
|--------------------------------------------------------------------------|-----------|-----------|-----------|
| <b>PC: Pd(PH<sub>3</sub>)<sub>2</sub> + C<sub>6</sub>H<sub>5</sub>Cl</b> |           |           |           |
| <b>[-2389.91]</b>                                                        |           |           |           |
| C                                                                        | -0.005362 | 0.494405  | -0.249009 |
| C                                                                        | -1.144992 | -0.318254 | -0.331174 |
| C                                                                        | -1.015124 | -1.715080 | -0.357174 |
| C                                                                        | 0.251150  | -2.307625 | -0.307007 |
| C                                                                        | 1.389015  | -1.497814 | -0.228077 |
| C                                                                        | 1.263442  | -0.100488 | -0.202173 |
| H                                                                        | -2.140036 | 0.121803  | -0.354823 |
| H                                                                        | -1.908199 | -2.335816 | -0.409955 |
| H                                                                        | 0.350063  | -3.391128 | -0.323976 |
| H                                                                        | 2.379298  | -1.948226 | -0.179758 |
| H                                                                        | 2.160680  | 0.510538  | -0.124906 |
| Pd                                                                       | -0.201955 | 2.555867  | -0.090462 |
| Cl                                                                       | -0.355195 | 2.366113  | 2.283656  |
| P                                                                        | -0.036054 | 2.494194  | -2.348899 |
| H                                                                        | -0.991371 | 1.730853  | -3.070966 |
| H                                                                        | -0.091802 | 3.678728  | -3.139281 |
| H                                                                        | 1.136505  | 1.931838  | -2.919621 |
| P                                                                        | -0.443595 | 4.906656  | 0.403386  |
| H                                                                        | -0.476671 | 5.977845  | -0.543958 |
| H                                                                        | -1.601850 | 5.271351  | 1.136482  |
| H                                                                        | 0.530256  | 5.459889  | 1.273813  |

|                                                                                                      |           |           |           |
|------------------------------------------------------------------------------------------------------|-----------|-----------|-----------|
| <b>RC: Pd(PH<sub>2</sub>C<sub>2</sub>H<sub>4</sub>PH<sub>2</sub>) + C<sub>6</sub>H<sub>5</sub>Cl</b> |           |           |           |
| <b>[-2932.35]</b>                                                                                    |           |           |           |
| Pd                                                                                                   | 2.877776  | 0.056055  | -0.683065 |
| P                                                                                                    | 1.934395  | 1.975371  | -1.632795 |
| C                                                                                                    | 0.093116  | 1.893608  | -1.171197 |
| C                                                                                                    | -0.439837 | 0.444234  | -1.182504 |
| P                                                                                                    | 0.715590  | -0.742441 | -0.253245 |
| H                                                                                                    | -0.499308 | -2.528809 | -1.838686 |
| H                                                                                                    | 0.018351  | 2.316595  | -0.160703 |

|    |           |           |           |
|----|-----------|-----------|-----------|
| H  | -0.491126 | 0.068587  | -2.212982 |
| H  | -1.452276 | 0.402002  | -0.766323 |
| H  | 2.129602  | 3.375325  | -1.397935 |
| H  | 1.805018  | 2.112528  | -3.052194 |
| H  | 0.144502  | -0.643526 | 1.055002  |
| H  | 0.049906  | -1.965675 | -0.584401 |
| C  | 5.871048  | 0.501192  | 1.640196  |
| C  | 5.314541  | -0.693857 | 2.166588  |
| C  | 4.715570  | -1.593046 | 1.306654  |
| C  | 4.620546  | -1.357172 | -0.095038 |
| C  | 5.197156  | -0.151044 | -0.611462 |
| C  | 5.820960  | 0.765983  | 0.282728  |
| H  | 5.370301  | -0.908007 | 3.229959  |
| Cl | 4.057786  | -3.114209 | 1.943604  |
| H  | 4.388724  | -2.190412 | -0.752500 |
| H  | 5.384957  | -0.062609 | -1.679119 |
| H  | 6.277913  | 1.668354  | -0.117426 |
| H  | 6.354294  | 1.201516  | 2.317935  |

**TS: Pd(PH<sub>2</sub>C<sub>2</sub>H<sub>4</sub>PH<sub>2</sub>) + C<sub>6</sub>H<sub>5</sub>Cl [-2918.19]**

|    |           |           |           |
|----|-----------|-----------|-----------|
| C  | -2.063323 | 0.695051  | 0.497452  |
| C  | -3.271007 | 0.377650  | -0.153797 |
| C  | -3.504269 | -0.951085 | -0.540495 |
| C  | -2.590982 | -1.958354 | -0.218798 |
| C  | -1.431764 | -1.634471 | 0.510955  |
| C  | -1.170908 | -0.321270 | 0.895436  |
| H  | -4.010291 | 1.148988  | -0.349987 |
| H  | -4.423161 | -1.192906 | -1.071876 |
| H  | -2.787925 | -2.989359 | -0.502312 |
| H  | -0.724654 | -2.416248 | 0.783506  |
| H  | -0.280172 | -0.073001 | 1.465398  |
| Pd | -1.365155 | 2.465533  | -0.637061 |
| Cl | -2.193988 | 2.302221  | 1.748840  |
| P  | -1.442236 | 4.486496  | -1.911635 |
| C  | 0.125285  | 4.449798  | -2.978213 |
| C  | 0.444647  | 3.021910  | -3.472925 |
| P  | 0.374776  | 1.760719  | -2.059800 |
| H  | 0.935958  | 4.819910  | -2.337085 |
| H  | 0.032260  | 5.140123  | -3.823281 |
| H  | 1.420746  | 2.994040  | -3.968917 |
| H  | -0.306831 | 2.698299  | -4.204994 |
| H  | 0.496046  | 0.565186  | -2.835630 |
| H  | 1.749539  | 1.784963  | -1.657910 |
| H  | -2.415644 | 4.677007  | -2.943346 |
| H  | -1.394459 | 5.863029  | -1.524732 |

**PC: Pd(PH<sub>2</sub>C<sub>2</sub>H<sub>4</sub>PH<sub>2</sub>) + C<sub>6</sub>H<sub>5</sub>Cl [-2948.58]**

|    |           |           |           |
|----|-----------|-----------|-----------|
| C  | -1.784815 | 0.388833  | -0.167693 |
| C  | -3.027580 | -0.179787 | -0.482916 |
| C  | -3.301203 | -1.514163 | -0.147806 |
| C  | -2.336628 | -2.292743 | 0.501840  |
| C  | -1.096028 | -1.729504 | 0.816836  |
| C  | -0.818069 | -0.395620 | 0.478501  |
| H  | -3.799562 | 0.413147  | -0.969019 |
| H  | -4.274412 | -1.939246 | -0.389404 |
| H  | -2.552088 | -3.326681 | 0.764251  |
| H  | -0.339710 | -2.322448 | 1.329324  |
| H  | 0.150566  | 0.024439  | 0.744014  |
| Pd | -1.408539 | 2.386111  | -0.613562 |
| Cl | -2.627214 | 3.107436  | 1.296740  |
| P  | -0.856302 | 4.610051  | -1.293748 |
| C  | 0.432930  | 4.452304  | -2.665997 |
| C  | 0.150366  | 3.199309  | -3.526413 |
| P  | -0.261976 | 1.716749  | -2.437070 |
| H  | 1.403606  | 4.357348  | -2.163053 |
| H  | 0.469884  | 5.353376  | -3.286983 |
| H  | 0.994788  | 2.969474  | -4.185857 |
| H  | -0.730041 | 3.361997  | -4.161102 |
| H  | -0.794727 | 0.793081  | -3.376307 |
| H  | 1.007753  | 1.096206  | -2.258949 |
| H  | -1.838897 | 5.438736  | -1.909065 |
| H  | -0.272122 | 5.605705  | -0.462626 |

**RC: Pd(PH<sub>3</sub>) + C<sub>6</sub>H<sub>5</sub>CH<sub>3</sub> [-2428.21]**

|    |           |           |           |
|----|-----------|-----------|-----------|
| C  | -2.138337 | -0.344927 | -0.008996 |
| C  | -3.215366 | -1.233101 | -0.082249 |
| C  | -3.077068 | -2.584701 | 0.284237  |
| C  | -1.847905 | -3.075219 | 0.717121  |
| C  | -0.725717 | -2.210501 | 0.770517  |
| C  | -0.879181 | -0.844395 | 0.420739  |
| H  | -4.182157 | -0.870273 | -0.427837 |
| H  | -3.936726 | -3.248880 | 0.224027  |
| H  | -1.732554 | -4.123402 | 0.981953  |
| H  | 0.269324  | -2.624572 | 0.928552  |
| H  | -0.000488 | -0.206999 | 0.340358  |
| C  | -2.280642 | 1.107915  | -0.413467 |
| H  | -2.029299 | 1.776622  | 0.419262  |
| H  | -3.303271 | 1.333751  | -0.733193 |
| H  | -1.604487 | 1.355005  | -1.243189 |
| Pd | -0.865057 | -1.149205 | 2.800458  |
| P  | -0.774842 | -0.441528 | 4.917213  |
| H  | -1.079595 | -1.314014 | 6.006553  |
| H  | 0.443850  | 0.045855  | 5.479368  |
| H  | -1.579075 | 0.638416  | 5.393129  |

**TS: Pd(PH<sub>3</sub>) + C<sub>6</sub>H<sub>5</sub>CH<sub>3</sub> [-2390.31]**

|    |           |           |           |
|----|-----------|-----------|-----------|
| C  | -1.236787 | 1.300065  | -0.486036 |
| C  | -2.532731 | 0.764345  | -0.350017 |
| C  | -2.716996 | -0.619596 | -0.238918 |
| C  | -1.618528 | -1.485818 | -0.294151 |
| C  | -0.330776 | -0.961766 | -0.462569 |
| C  | -0.139006 | 0.420473  | -0.575715 |
| H  | -3.397068 | 1.424128  | -0.325461 |
| H  | -3.722247 | -1.019822 | -0.117218 |
| H  | -1.765831 | -2.561234 | -0.219943 |
| H  | 0.527524  | -1.629643 | -0.515594 |
| H  | 0.863885  | 0.812240  | -0.729929 |
| Pd | -0.880014 | 3.108485  | 0.408523  |
| C  | -1.148209 | 2.957034  | -1.795720 |
| H  | -0.885898 | 4.022730  | -1.764915 |
| H  | -2.168847 | 2.826264  | -2.150201 |
| H  | -0.441752 | 2.420242  | -2.424996 |
| P  | -0.490462 | 4.898974  | 1.825605  |
| H  | -1.413908 | 5.977593  | 1.960271  |
| H  | -0.356863 | 4.660292  | 3.226540  |
| H  | 0.669172  | 5.722512  | 1.718528  |

**PC: Pd(PH<sub>3</sub>) + C<sub>6</sub>H<sub>5</sub>CH<sub>3</sub> [-2398.48]**

|    |           |           |           |
|----|-----------|-----------|-----------|
| C  | -1.180064 | 1.396382  | -0.045431 |
| C  | -2.475937 | 0.875306  | 0.086061  |
| C  | -2.665635 | -0.511408 | 0.191444  |
| C  | -1.572080 | -1.382929 | 0.150695  |
| C  | -0.282889 | -0.860956 | 0.000038  |
| C  | -0.082893 | 0.524242  | -0.105971 |
| H  | -3.340275 | 1.534368  | 0.107711  |
| H  | -3.675616 | -0.904576 | 0.298136  |
| H  | -1.723631 | -2.457608 | 0.227056  |
| H  | 0.576569  | -1.528476 | -0.043085 |
| H  | 0.926030  | 0.908323  | -0.234353 |
| Pd | -0.883429 | 3.400270  | -0.038252 |
| C  | -1.093493 | 3.304392  | -2.099987 |
| H  | -0.943222 | 4.362473  | -2.374974 |
| H  | -2.090448 | 2.974887  | -2.406583 |
| H  | -0.331829 | 2.681543  | -2.577498 |
| P  | -0.617939 | 3.654871  | 2.318143  |
| H  | -1.674099 | 3.266671  | 3.192675  |
| H  | 0.409824  | 2.931063  | 2.989458  |
| H  | -0.354572 | 4.907756  | 2.950949  |

**RC: Pd(PH<sub>3</sub>)<sub>2</sub> + C<sub>6</sub>H<sub>5</sub>CH<sub>3</sub> [-2785.04]**

|   |           |           |           |
|---|-----------|-----------|-----------|
| C | -1.847926 | -2.632183 | -0.076977 |
| C | -0.538174 | -3.099023 | 0.128854  |
| C | 0.452540  | -2.924065 | -0.843660 |
| C | 0.150977  | -2.276702 | -2.047201 |
| C | -1.149337 | -1.808881 | -2.267945 |
| C | -2.136244 | -1.986863 | -1.292124 |
| H | -0.292624 | -3.607983 | 1.060186  |
| H | 1.458853  | -3.297398 | -0.662737 |

|    |           |           |           |
|----|-----------|-----------|-----------|
| H  | 0.918925  | -2.143230 | -2.806250 |
| H  | -1.397563 | -1.309078 | -3.202543 |
| H  | -3.146222 | -1.623034 | -1.477210 |
| C  | -2.910918 | -2.794514 | 0.990840  |
| H  | -2.919988 | -1.931287 | 1.674207  |
| H  | -2.733310 | -3.689861 | 1.597920  |
| H  | -3.911382 | -2.872042 | 0.549691  |
| Pd | -3.087542 | 0.497442  | 3.761824  |
| P  | -1.619578 | 1.706520  | 2.487129  |
| H  | -0.328262 | 1.198445  | 2.161677  |
| H  | -1.951030 | 2.115768  | 1.162455  |
| H  | -1.167273 | 2.985521  | 2.925079  |
| P  | -4.550911 | -0.640573 | 5.096443  |
| H  | -4.212689 | -1.908294 | 5.655875  |
| H  | -5.021079 | -0.069866 | 6.315541  |
| H  | -5.836185 | -1.036678 | 4.621454  |

**TS: Pd(PH<sub>3</sub>)<sub>2</sub> + C<sub>6</sub>H<sub>5</sub>CH<sub>3</sub> [-2739.07]**

|    |           |           |           |
|----|-----------|-----------|-----------|
| C  | -1.119174 | 1.432043  | -0.399715 |
| C  | -2.510607 | 1.378146  | -0.157713 |
| C  | -3.119054 | 0.197483  | 0.289040  |
| C  | -2.365875 | -0.966363 | 0.474207  |
| C  | -0.987856 | -0.934711 | 0.208003  |
| C  | -0.373236 | 0.239597  | -0.230235 |
| H  | -3.124060 | 2.262354  | -0.318977 |
| H  | -4.191106 | 0.189713  | 0.481613  |
| H  | -2.841682 | -1.885318 | 0.809117  |
| H  | -0.387706 | -1.833897 | 0.342036  |
| H  | 0.694242  | 0.234160  | -0.443682 |
| Pd | -0.228902 | 3.323548  | -0.018404 |
| C  | -0.720193 | 2.467566  | -2.074934 |
| H  | -1.590373 | 3.058386  | -2.367969 |
| H  | -0.764455 | 1.496442  | -2.561579 |
| H  | 0.214946  | 2.948422  | -2.391979 |
| P  | 0.356502  | 3.023741  | 2.271664  |
| H  | 0.942342  | 1.783253  | 2.670236  |
| H  | 1.223297  | 3.837111  | 3.070645  |
| H  | -0.693004 | 2.983738  | 3.239849  |
| P  | 0.167739  | 5.654225  | -0.433110 |
| H  | 1.354894  | 6.343123  | -0.031916 |
| H  | 0.156010  | 6.211704  | -1.752424 |
| H  | -0.721497 | 6.629395  | 0.114619  |

**PC: Pd(PH<sub>3</sub>)<sub>2</sub> + C<sub>6</sub>H<sub>5</sub>CH<sub>3</sub> [-2757.63]**

|    |           |           |           |
|----|-----------|-----------|-----------|
| C  | -1.036830 | 1.374646  | 0.031786  |
| C  | -2.403805 | 1.097901  | 0.223938  |
| C  | -2.870398 | -0.221941 | 0.318216  |
| C  | -1.978490 | -1.295680 | 0.219730  |
| C  | -0.617049 | -1.037316 | 0.025381  |
| C  | -0.152928 | 0.283539  | -0.068592 |
| H  | -3.123622 | 1.912369  | 0.293656  |
| H  | -3.933948 | -0.407920 | 0.464038  |
| H  | -2.340154 | -2.319855 | 0.288812  |
| H  | 0.088479  | -1.863286 | -0.058618 |
| H  | 0.910761  | 0.452632  | -0.230816 |
| Pd | -0.343899 | 3.342710  | -0.075626 |
| C  | -0.698785 | 3.169519  | -2.168264 |
| H  | -1.457562 | 3.914142  | -2.438442 |
| H  | -1.044967 | 2.173889  | -2.444496 |
| H  | 0.238807  | 3.394137  | -2.691304 |
| P  | -0.067669 | 3.189864  | 2.282009  |
| H  | -1.216434 | 2.851842  | 3.050641  |
| H  | 0.769378  | 2.148663  | 2.771961  |
| H  | 0.416484  | 4.207699  | 3.162886  |
| P  | 0.398160  | 5.563683  | -0.421005 |
| H  | 1.750059  | 5.938743  | -0.160164 |
| H  | 0.325565  | 6.126221  | -1.727440 |
| H  | -0.190919 | 6.668670  | 0.263458  |

**RC: Pd(PH<sub>2</sub>C<sub>2</sub>H<sub>4</sub>PH<sub>2</sub>) + C<sub>6</sub>H<sub>5</sub>CH<sub>3</sub> [-3333.42]**

|    |          |          |           |
|----|----------|----------|-----------|
| Pd | 2.093483 | 0.445843 | -0.062047 |
| P  | 2.506540 | 2.309390 | -1.411165 |
| C  | 1.926501 | 1.777745 | -3.142345 |
| C  | 2.207788 | 0.284188 | -3.414221 |

|   |           |           |           |
|---|-----------|-----------|-----------|
| P | 1.652771  | -0.820375 | -1.969534 |
| H | 2.390173  | 2.404086  | -3.912308 |
| H | 0.845555  | 1.969386  | -3.168248 |
| H | 3.287512  | 0.116232  | -3.522267 |
| H | 1.729904  | -0.035179 | -4.346837 |
| H | 1.985891  | 3.645650  | -1.449464 |
| H | 3.844129  | 2.705823  | -1.740002 |
| H | 0.309744  | -1.079628 | -2.397068 |
| H | 2.168821  | -2.058865 | -2.477008 |
| C | 3.588012  | 0.994056  | 2.636949  |
| C | 2.235188  | 0.734106  | 2.278083  |
| C | 1.788161  | -0.612988 | 2.096606  |
| C | 2.751864  | -1.653927 | 2.259025  |
| C | 4.068125  | -1.380358 | 2.595650  |
| C | 4.492532  | -0.044169 | 2.792315  |
| H | 1.503308  | 1.534344  | 2.374385  |
| H | -0.022365 | -1.129388 | 3.164354  |
| H | 2.427168  | -2.686581 | 2.137744  |
| H | 4.776273  | -2.197298 | 2.719384  |
| H | 5.522567  | 0.163948  | 3.073868  |
| H | 3.898955  | 2.023365  | 2.805153  |
| C | 0.303887  | -0.955447 | 2.127204  |
| H | -0.311730 | -0.147722 | 1.718156  |
| H | 0.092796  | -1.866694 | 1.557240  |

**TS: Pd(PH<sub>2</sub>C<sub>2</sub>H<sub>4</sub>PH<sub>2</sub>) + C<sub>6</sub>H<sub>5</sub>CH<sub>3</sub> [-3296.44]**

|    |           |           |           |
|----|-----------|-----------|-----------|
| C  | -2.027622 | 0.623479  | 0.343675  |
| C  | -3.222152 | 0.082278  | -0.184284 |
| C  | -3.438569 | -1.301341 | -0.203519 |
| C  | -2.488887 | -2.179777 | 0.329732  |
| C  | -1.313749 | -1.652463 | 0.888481  |
| C  | -1.088691 | -0.275127 | 0.907562  |
| H  | -3.986280 | 0.744474  | -0.586885 |
| H  | -4.361359 | -1.690972 | -0.631784 |
| H  | -2.663014 | -3.253443 | 0.322714  |
| H  | -0.566645 | -2.321729 | 1.313671  |
| H  | -0.174787 | 0.109027  | 1.357176  |
| Pd | -1.333356 | 2.391584  | -0.606710 |
| C  | -2.381883 | 2.269593  | 1.417045  |
| P  | -1.089543 | 4.640452  | -1.415000 |
| C  | 0.236034  | 4.603325  | -2.771150 |
| C  | 0.144332  | 3.308172  | -3.607234 |
| P  | -0.015206 | 1.785687  | -2.488683 |
| H  | 1.201901  | 4.651821  | -2.251215 |
| H  | 0.161497  | 5.488073  | -3.411899 |
| H  | 1.005874  | 3.215659  | -4.276888 |
| H  | -0.758918 | 3.323722  | -4.231102 |
| H  | -0.261394 | 0.801784  | -3.497535 |
| H  | 1.371488  | 1.463972  | -2.335374 |
| H  | -2.156159 | 5.238964  | -2.158368 |
| H  | -0.690831 | 5.859403  | -0.776483 |
| H  | -2.527966 | 1.577614  | 2.242394  |
| H  | -3.339955 | 2.726320  | 1.158449  |
| H  | -1.656816 | 3.025459  | 1.746321  |

**PC: Pd(PH<sub>2</sub>C<sub>2</sub>H<sub>4</sub>PH<sub>2</sub>) + C<sub>6</sub>H<sub>5</sub>CH<sub>3</sub> [-3316.13]**

|    |           |           |           |
|----|-----------|-----------|-----------|
| C  | -1.859794 | 0.438525  | -0.055002 |
| C  | -3.050652 | -0.181053 | -0.477800 |
| C  | -3.335746 | -1.513759 | -0.143789 |
| C  | -2.433663 | -2.258327 | 0.624477  |
| C  | -1.246092 | -1.656672 | 1.055288  |
| C  | -0.964467 | -0.323743 | 0.718740  |
| H  | -3.777372 | 0.374442  | -1.069573 |
| H  | -4.267324 | -1.966621 | -0.482112 |
| H  | -2.655121 | -3.291119 | 0.887435  |
| H  | -0.536008 | -2.221681 | 1.658612  |
| H  | -0.035353 | 0.118404  | 1.076673  |
| Pd | -1.416170 | 2.408954  | -0.595217 |
| C  | -2.462925 | 2.935475  | 1.185691  |
| P  | -0.900322 | 4.606041  | -1.260471 |
| C  | 0.388288  | 4.550402  | -2.643073 |
| C  | 0.137630  | 3.336334  | -3.565321 |
| P  | -0.224290 | 1.790506  | -2.536505 |
| H  | 1.362591  | 4.456389  | -2.146437 |
| H  | 0.396500  | 5.485760  | -3.212602 |

|   |           |          |           |   |           |          |           |
|---|-----------|----------|-----------|---|-----------|----------|-----------|
| H | 0.983281  | 3.173817 | -4.242045 | H | -0.349421 | 5.625370 | -0.429008 |
| H | -0.753026 | 3.506690 | -4.183758 | H | -1.960628 | 2.455998 | 2.031486  |
| H | -0.681401 | 0.899266 | -3.550432 | H | -3.484109 | 2.549466 | 1.110488  |
| H | 1.083686  | 1.232391 | -2.413818 | H | -2.486480 | 4.019599 | 1.335680  |
| H | -1.905549 | 5.423540 | -1.860630 |   |           |          |           |

---
